# Supplementary material
Source: Copernicus journal article supplement (doi:10.5194/egusphere-2026-2730)
Supplement: Supplementary file 1 [file egusphere-2026-2730-supplement.pdf]

*Supplement for*

**Estimating Twomey forcing sensitivity to aerosol plume spreading rates**

Lucas A. McMichael<sup>1</sup>, Ehsan Erfani<sup>2</sup>, Robert Wood<sup>1</sup>, and Knut von Salzen<sup>1</sup>

<sup>1</sup>University of Washington, Seattle, WA, USA

<sup>2</sup>Desert Research Institute, Reno, NV, USA

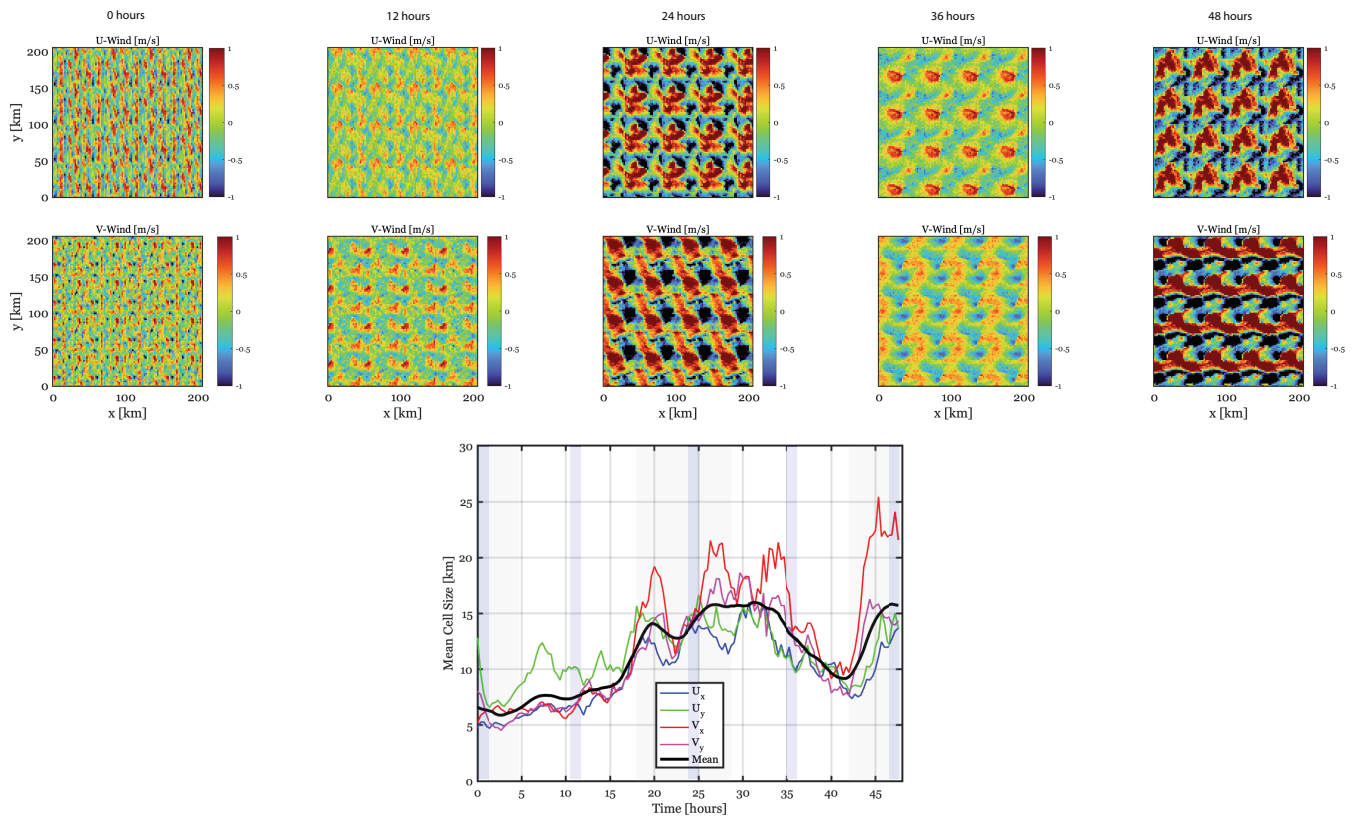

**Figure S1:** Top panels show U (top row) and V (bottom row) wind fields from a single LES case used to determine mesoscale cell size, starting at 0 hours on the left and increasing by 12 hour increments. The counting operation was performed on the tiled, clipped, and coarse-grained LES wind fields, using a 1 km x1 km bin which was comprised of 100 LES grid columns. The size of the mesoscale cells was determined by counting and storing the number of consecutive coarse-grained bins with a given sign and taking the median value of the consecutive bins array as the characteristic size of the flow field. This operation was performed in the x- and y-dimensions of the U and V velocity fields and the final mesoscale cell size is the average of all four of these components. An example of the characteristic cell sizes along each dimension and the mean cell size is shown in the bottom plot.

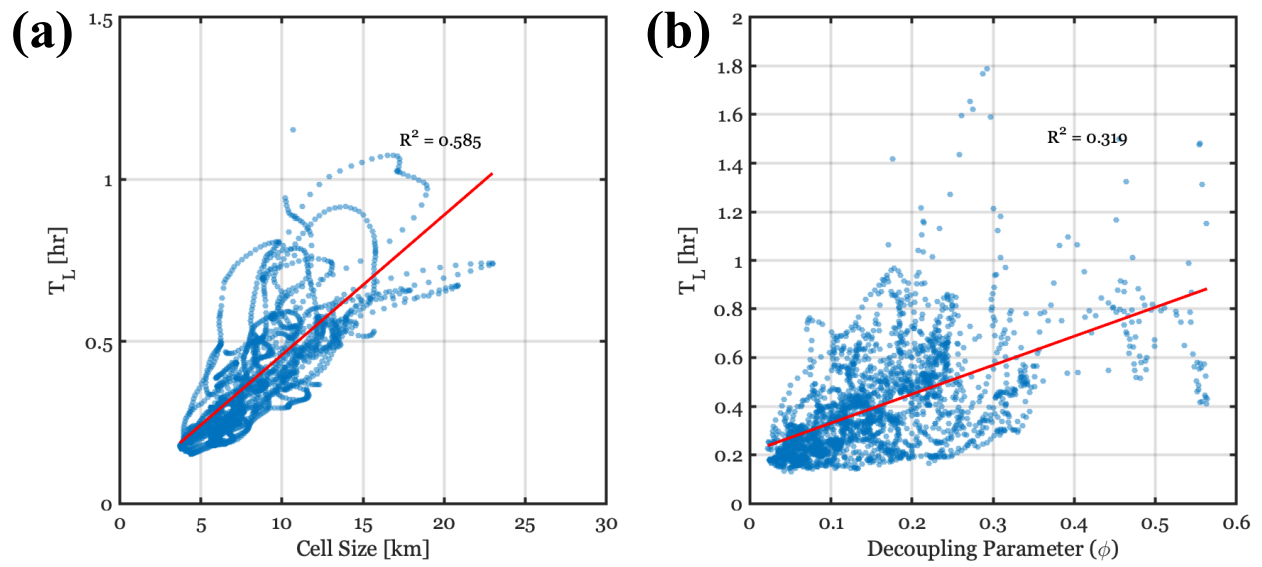

**Figure S2:** (a) Scatterplot showing the relationship between mesoscale cell size and the relaxation timescale, plotted at 20-minute output frequency for the 17 cases. (b) Scatterplot showing the relationship between the decoupling parameter and the relaxation timescale.

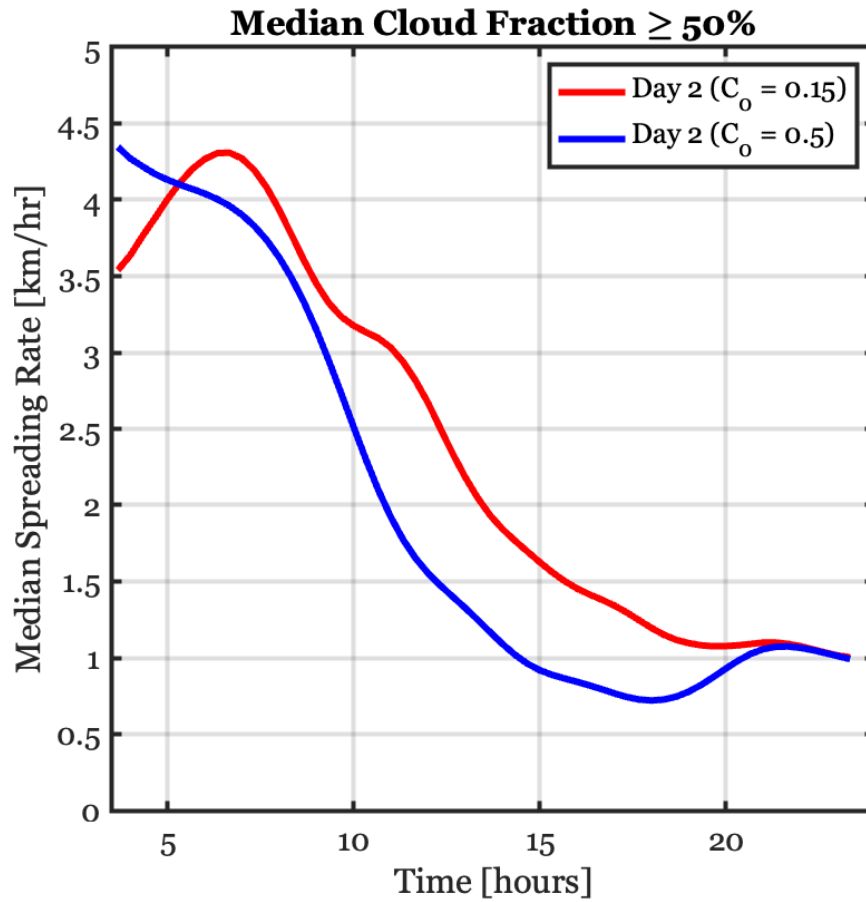

**Figure S3:** The ensemble median spreading rates for Day 2 simulations with  $C_0$  values that respond to surface precipitation rate (red line) and fixed  $C_0 = 0.5$  (blue line).
